# Supplementary material for: An Integrated Genomic Screen Identifies LDHB as an Essential Gene for Triple-Negative Breast Cancer
Source: Oxford University Press journal article supplement (doi:10.1158/0008-5472.can-12-1098), 2012-11-09
Supplement: 00085472can121098-sup-tab1.xlsx [file 00085472can121098-sup-tab1.xlsx]

## Sheet: Sheet1
	Supplemental Table 1
	Cell Line	Starting cell number/ well	Transfection reagent	Amount transfection reagent/ well
	Cal-120	1700	Dharmafect 1	0.1 ul
	HCC38	2000	Dharmafect 4	0.05 ul
	HS578T	2000	RNAiMax	0.125 ul
	MDA-MB231.X1	2000	Dharmafect 4	0.0625 ul
	BT-549	2000	Dharmafect 1	0.1 ul
	Cal-51	2800	Dharmafect 1	0.1 ul
	MDA-MB436	7500	RNAiMax	0.1 ul
	SW982	3500	Dharmafect 4	0.05 ul
	HCC1395	12000	Dharmafect 3	0.25 ul
	HCC1419	12000	Dharmafect 1	0.2 ul
	KPL-1	3000	Dharmafect 4	0.04 ul
	MCF7	7000	Dharmafect 4	0.09 ul
	T-47D	6000	Dharmafect 1	0.1 ul
