# Supplementary material for: An Integrated Genomic Screen Identifies LDHB as an Essential Gene for Triple-Negative Breast Cancer
Source: Oxford University Press journal article supplement (doi:10.1158/0008-5472.can-12-1098), 2012-11-09
Supplement: 00085472can121098-sup-tab3.xlsx [file 00085472can121098-sup-tab3.xlsx]

## Sheet: Sheet1
Supplementary Table 3
Glycolysis signiture genes:			Oxidative phosphorylation signiture genes:
Entrez Gene ID	Symbol		Entrez Gene ID	Symbol
226	ALDOA		479	ATP12A
228	ALDOAP2		496	ATP4B
229	ALDOB		514	ATP5E
230	ALDOC		523	ATP6V1A
771	CA12		525	ATP6V1B1
2023	ENO1		526	ATP6V1B2
2026	ENO2		527	ATP6V0C
2027	ENO3		528	ATP6V1C1
2821	GPI		529	ATP6V1E1
3091	HIF1A		533	ATP6V0B
3098	HK1		534	ATP6V1G2
3099	HK2		535	ATP6V0A1
3101	HK3		537	ATP6AP1
3939	LDHA		539	ATP5O
3945	LDHB		540	ATP7B
3948	LDHC		1327	COX4I1
5163	PDK1		1329	COX5B
5164	PDK2		1337	COX6A1
5166	PDK4		1339	COX6A2
5208	PFKFB2		1340	COX6B1
5209	PFKFB3		1345	COX6C
5210	PFKFB4		1346	COX7A1
5211	PFKL		1347	COX7A2
5213	PFKM		1349	COX7B
5214	PFKP		1350	COX7C
5230	PGK1		1351	COX8A
5232	PGK2		1352	COX10
5236	PGM1		4694	NDUFA1
5313	PKLR		4697	NDUFA4
5315	PKM2		4698	NDUFA5
6513	SLC2A1		4702	NDUFA8
6514	SLC2A2		4705	NDUFA10
6515	SLC2A3		4708	NDUFB2
6517	SLC2A4		4711	NDUFB5
6518	SLC2A5		4712	NDUFB6
6566	SLC16A1		4713	NDUFB7
6567	SLC16A2		4719	NDUFS1
9120	SLC16A6		4720	NDUFS2
9121	SLC16A5		4723	NDUFV1
9122	SLC16A4		4729	NDUFV2
9123	SLC16A3		6389	SDHA
9194	SLC16A7		6390	SDHB
11182	SLC2A6		7381	UQCRB
23539	SLC16A8		7384	UQCRC1
29988	SLC2A8		7386	UQCRFS1
55276	PGM2		7388	UQCRH
55662	HIF1AN		8992	ATP6V0E1
56606	SLC2A9		9114	ATP6V0D1
56731	SLC2A4RG		9296	ATP6V1F
64344	HIF3A		9377	COX5A
66035	SLC2A11		9550	ATP6V1G1
81031	SLC2A10		27068	PPA2
114134	SLC2A13		50617	ATP6V0A4
117247	SLC16A10		51382	ATP6V1D
144195	SLC2A14		51606	ATP6V1H
151473	SLC16A14		126328	NDUFA11
154091	SLC2A12		127124	ATP6V1G3
201232	SLC16A13		245973	ATP6V1C2
220963	SLC16A9
